# Supplementary material for: Pharmacoinformatics, Adaptive Evolution, and Elucidation of Six Novel Compounds for Schizophrenia Treatment by Targeting DAOA (G72) Isoforms
Source: Hindawi journal article supplement (doi:10.1155/2017/5925714), 2017-01-01
Supplement: f1 [file 5925714.f1.zip]

| Name         | ERRAT | F.R.   | A.R. | D.R (Outliers) |      |
|--------------|-------|--------|------|----------------|------|
| DAOA-125-M1  |       | 63.948 | 96.2 | 1.7            | 2.1  |
| DAOA-125-M2  |       | 71.245 | 94.6 | 4.2            | 1.3  |
| DAOA-125-M3  |       | 72.103 | 95   | 2.5            | 2.5  |
| DAOA-125-M4  |       | 76.623 | 94.1 | 4.2            | 1.7  |
| DAOA-125-M5  |       | 80.258 | 95   | 3.3            | 1.7  |
| DAOA-125-M6  |       | 71.245 | 94.1 | 2.9            | 2.9  |
| DAOA-125-M7  |       | 66.094 | 96.2 | 2.9            | 0.8  |
| DAOA-125-M8  |       | 77.253 | 95   | 2.5            | 2.5  |
| DAOA-125-M9  |       | 82.833 | 94.6 | 3.3            | 2.1  |
| DAOA-125-M10 |       | 69.957 | 96.7 | 1.7            | 1.7  |
| DAOA-125-M11 |       | 67.1   | 93.3 | 5              | 1.7  |
| DAOA-125-M12 |       | 65.517 | 93.3 | 5              | 1.7  |
| DAOA-125-M13 |       | 70.435 | 93.7 | 5              | 1.3  |
| DAOA-125-M14 |       | 77.922 | 94.1 | 3.3            | 2.5  |
| DAOA-125-M15 |       | 70.815 | 93.7 | 4.6            | 1.7  |
| DAOA-125-M16 |       | 79.399 | 93.7 | 3.8            | 2.5  |
| DAOA-125-M17 |       | 72.532 | 94.1 | 3.8            | 2.1  |
| DAOA-125-M18 |       | 70.815 | 91.6 | 6.7            | 1.7  |
| DAOA-125-M19 |       | 69.397 | 94.1 | 3.8            | 2.1  |
| DAOA-125-M20 |       | 69.528 | 92.1 | 7.1            | 0.8  |
| DAOA-125-M21 |       | 38.182 | 91.9 | 4.9            | 3.3  |
| DAOA-125-M22 |       | 66.667 | 47.2 | 30.9           | 22   |
| DAOA-125-M23 |       | 76.068 | 56.9 | 30.9           | 12.2 |
| DAOA-125-M24 |       | 79.487 | 52   | 23.5           | 15.4 |
| DAOA-125-M25 |       | 62.931 | 61.8 | 25.2           | 13   |
| DAOA-125-M26 |       | 60.684 | 52   | 25.2           | 22.8 |

| Name        | ERRAT | F.R.   | A.R. | D.R (Outliers) |      |
|-------------|-------|--------|------|----------------|------|
| DAOA-82-M1  |       | 58.333 | 91.2 | 7.5            | 1    |
| DAOA-82-M2  |       | 39.062 | 96.2 | 3.8            | 0    |
| DAOA-82-M3  |       | 35.616 | 90   | 6.2            | 3.8  |
| DAOA-82-M4  |       | 45.07  | 92.5 | 5              | 2.5  |
| DAOA-82-M5  |       | 58.824 | 92.5 | 3.8            | 3.8  |
| DAOA-82-M6  |       | 39.13  | 90   | 6.2            | 3.8  |
| DAOA-82-M7  |       | 40.845 | 93.8 | 3.8            | 2.5  |
| DAOA-82-M8  |       | 40     | 87.5 | 7.5            | 5    |
| DAOA-82-M9  |       | 35.714 | 92.5 | 5              | 2.5  |
| DAOA-82-M10 |       | 51.562 | 93.8 | 5              | 1.2  |
| DAOA-82-M11 |       | 55.882 | 88.8 | 11.2           | 0    |
| DAOA-82-M12 |       | 28.767 | 92.5 | 6.2            | 1.2  |
| DAOA-82-M13 |       | 27.397 | 91.2 | 6.2            | 2.5  |
| DAOA-82-M14 |       | 46.479 | 95   | 3.8            | 1.2  |
| DAOA-82-M15 |       | 30.137 | 93.8 | 3.8            | 2.5  |
| DAOA-82-M16 |       | 52.113 | 95   | 0              | 5    |
| DAOA-82-M17 |       | 33.333 | 95   | 3.8            | 1.2  |
| DAOA-82-M18 |       | 25.373 | 90   | 5              | 5    |
| DAOA-82-M19 |       | 43.836 | 88   | 6.2            | 5    |
| DAOA-82-M20 |       | 52.055 | 93.8 | 1.2            | 5    |
| DAOA-82-M21 |       | 42.254 | 92.5 | 7.5            | 0    |
| DAOA-82-M22 |       | 85.135 | 48.8 | 25             | 26.2 |
| DAOA-82-M23 |       | 58.108 | 60   | 26.2           | 13.8 |
| DAOA-82-M24 |       | 64.865 | 40   | 32.5           | 27.5 |
| DAOA-82-M25 |       | 72.973 | 60   | 21.2           | 18.8 |
| DAOA-82-M26 |       | 68.919 | 51.2 | 33.8           | 15   |
| DAOA-82-M27 |       | 37.838 | 80   | 12.5           | 7.5  |

| Name         | ERRAT | F.R.   | A.R. | D.R (Outliers) |      |
|--------------|-------|--------|------|----------------|------|
| DAOA-126-M1  |       | 52.991 | 88.7 | 8.1            | 3.2  |
| DAOA-126-M2  |       | 36.207 | 92.7 | 6.5            | 0.8  |
| DAOA-126-M3  |       | 42.056 | 91.9 | 4.8            | 3.2  |
| DAOA-126-M4  |       | 24.324 | 88.7 | 9.7            | 1.6  |
| DAOA-126-M5  |       | 24.348 | 88.7 | 6.5            | 4.8  |
| DAOA-126-M6  |       | 30.172 | 87.1 | 10.5           | 2.4  |
| DAOA-126-M7  |       | 30.909 | 84.7 | 10.5           | 4.8  |
| DAOA-126-M8  |       | 29.565 | 86.3 | 11.3           | 2.4  |
| DAOA-126-M9  |       | 40.351 | 91.1 | 6.5            | 2.4  |
| DAOA-126-M10 |       | 35.345 | 86.3 | 9.7            | 4    |
| DAOA-126-M11 |       | 30.508 | 62.9 | 20.2           | 16.9 |
| DAOA-126-M12 |       | 80.508 | 62.1 | 20.2           | 17.7 |
| DAOA-126-M13 |       | 53.39  | 54   | 27.4           | 18.5 |
| DAOA-126-M14 |       | 61.017 | 72.6 | 16.9           | 10.5 |
| DAOA-126-M15 |       | 83.898 | 79   | 12.1           | 8.9  |
| DAOA-126-M16 |       | 28.814 | 85.5 | 7.3            | 7.3  |
| DAOA-126-M17 |       | 25.862 | 87.1 | 10.5           | 2.4  |

| Name         | ERRAT | F.R.   | A.R. | D.R (Outliers) |      |
|--------------|-------|--------|------|----------------|------|
| DAOA-153-M1  |       | 43.75  | 88.1 | 9.3            | 2.6  |
| DAOA-153-M2  |       | 32.624 | 92.7 | 4              | 3.3  |
| DAOA-153-M3  |       | 18.705 | 91.4 | 6.6            | 2    |
| DAOA-153-M4  |       | 28.169 | 92.7 | 3.3            | 4    |
| DAOA-153-M5  |       | 23.611 | 83.4 | 10.6           | 6    |
| DAOA-153-M6  |       | 40.845 | 90.7 | 4.6            | 4.6  |
| DAOA-153-M7  |       | 38.462 | 90.1 | 7.9            | 2    |
| DAOA-153-M8  |       | 30.986 | 90.1 | 6              | 4    |
| DAOA-153-M9  |       | 25.874 | 90.1 | 6              | 4    |
| DAOA-153-M10 |       | 21.127 | 87.4 | 7.9            | 4.6  |
| DAOA-153-M11 |       | 88.966 | 83.4 | 11.3           | 5.3  |
| DAOA-153-M12 |       | 90.345 | 65.6 | 29.8           | 4.6  |
| DAOA-153-M13 |       | 97.931 | 67.5 | 19.2           | 13.2 |
| DAOA-153-M14 |       | 87.586 | 74.2 | 15.2           | 10.6 |
| DAOA-153-M15 |       | 27.143 | 92.7 | 4.6            | 2.6  |
| DAOA-153-M16 |       | 79.07  | 93.4 | 4              | 2.6  |
