# Supplementary material for: Pharmacoinformatics, Adaptive Evolution, and Elucidation of Six Novel Compounds for Schizophrenia Treatment by Targeting DAOA (G72) Isoforms
Source: Hindawi journal article supplement (doi:10.1155/2017/5925714), 2017-01-01
Supplement: f1 [file 5925714.f1.zip]

## Top ten predicted binding pockets through SiteHound

### DAOA82

| Rank | Energy<br>(kcal/mol) | Energy Range    | Volume<br>(Å) | Center<br>x | Center<br>y | Center<br>z | Residues                                                                                                     |
|------|----------------------|-----------------|---------------|-------------|-------------|-------------|--------------------------------------------------------------------------------------------------------------|
| 1    | -718.72              | (-17.14, -8.93) | 63.00         | 24.955      | 20.339      | 27.888      | Glu-25, Ser-28, Ser-29, Val-31, Gly-32, Phe-35, Tyr-45, Glu-46, Ala-47, Ser-48, Asp-50, Arg-51, Arg-52       |
| 2    | -538.67              | (-15.21, -8.91) | 51.00         | 26.972      | 39.293      | 28.491      | Arg-8, Ser-9, Leu-10, Cys-11, Pro-12, Trp-13, Ser-15, Tyr-16, Leu-17, Tyr-63, Asn-64, Gln-66, Lys-67, Asp-68 |
| 3    | -309.49              | (-14.45, -9.02) | 28.00         | 18.151      | 25.082      | 35.550      | Tyr-21, Leu-24, Glu-25, Arg-52 Gln-53 Pro-54, Arg-57, Trp-59, Thr-60                                         |
| 4    | -281.54              | (-15.14, -8.97) | 25.00         | 34.866      | 33.473      | 30.34       | Ser-9, Leu-10, Leu-43, Lys-67, Asp-68, Cys-71, Asn-72, His-73, Lys-74, Ile-76, Thr-77                        |
| 5    | -277.95              | (-16.79, -9.03) | 24.00         | 21.289      | 31.801      | 19.518      | Gln-7, Arg-8, Pro-12, Tyr-16, Leu-17, Glu-23, Glu-26, Val-27, His-30, Lys-33                                 |
| 6    | -215.09              | (-16.07, -8.92) | 19.00         | 16.884      | 35.276      | 34.631      | Val-14, Ser-15, Pro-18, Pro-20, Trp-59, Thr-60, Asn-62                                                       |
| 7    | -204.36              | (-16.81, -8.93) | 18.00         | 33.796      | 15.296      | 23.977      | Phe-35, Met-36, Arg-38, Glu-41, Lys-80, Glu-82                                                               |
| 8    | -186.51              | (-13.27, -8.92) | 19.00         | 33.680      | 26.769      | 37.55       | Tyr-45, Glu-46, Ala-47, Arg-51, Leu-55, Cys-71, Asn-72, Lys-74, Glu-75, Ile-76, Thr-79                       |
| 9    | -153.11              | (-14.61, -9.04) | 14.00         | 34.888      | 38.377      | 38.810      | Gln-65, Gln-66, Lys-67, Asp-68, Gln-69, Asn-72, His-73, Lys-74                                               |
| 10   | -136.84              | (-11.70, -8.95) | 14.00         | 41.486      | 27.992      | 33.142      | His-73, Lys-74, Glu-75, Thr-77, Ser-78, Thr-79                                                               |

## DAOA125

| Rank | Energy<br>(kcal/mol) | Energy Range    | Volume<br>(Å) | Center<br>x | Center<br>y | Center<br>z | Residues                                                                                                                                     |
|------|----------------------|-----------------|---------------|-------------|-------------|-------------|----------------------------------------------------------------------------------------------------------------------------------------------|
| 1    | -1209.46             | (-20.79, -8.90) | 94.00         | 40.579      | 32.885      | 30.109      | Lys-55, Thr-59, Leu-67, Glu-68, Ser-71, Ser-72, Gly-75, Lys-76, Phe-78, Met-79, Glu-84, Met-101, Trp-102, Cys-104, Asn-105, Tyr-106, Asn-107 |
| 2    | -918.81              | (-13.37, -8.92) | 88.00         | 36.265      | 28.999      | 22.485      | Phe-53, His-54, Lys-55, Thr-56, Thr-59, Leu-67, Tyr-83, Pro-97, Arg-100, Met-101, Cys-104, Ser-113, Cys-114, Asn-115, His-116, Ile-119       |
| 3    | -734.39              | (-18.02, -8.90) | 66.00         | 20.845      | 37.491      | 35.600      | Arg-2, Ile-5, Trp-6, His-9, Asn-35, Gln-36, Trp-37, Asn-38, Lys-41, Phe-53                                                                   |
| 4    | -536.17              | (-15.86, -8.97) | 47.00         | 30.044      | 44.585      | 31.348      | Leu-25, Gln-29, Thr-33, Ser-34, Asn-35, Asn-38, Met-39, Gly-40, Trp-57, Glu-69, Val-70, His-73                                               |
| 5    | -527.45              | (-15.92, -8.92) | 49.00         | 27.654      | 16.440      | 35.958      | His-16, Leu-45, Asp-46, Ser-47, Gly-48, Asp-49, Glu-50, Phe-85, Leu-86, Ala-87, Tyr-88, Glu-89, Ala-90, Arg-94                               |
| 6    | -507.06              | (-17.42, -9.20) | 43.00         | 37.345      | 37.511      | 19.112      | Thr-59, Glu-60, Thr-61, Gly-62, Pro-64, Tyr-65, Arg-66, Leu-67, Cys-114, His-116, Lys-117, Glu-118, Ile-119, Thr-120                         |
| 7    | -406.91              | (-20.38, -9.07) | 33.00         | 43.928      | 33.062      | 22.207      | Leu-67, Cys-104, Tyr-106, Asn-107, Gln-108, Gln-109, Lys-110, Asp-111, Ser-113, Cys-114                                                      |
| 8    | -380.91              | (-14.14, -8.93) | 36.00         | 31.655      | 21.853      | 40.301      | Leu-45, Asp-46, Ser-47, Arg-81, Asn-82, Tyr-83, Glu-84, Phe-85, Leu-86                                                                       |
| 9    | -256.93              | (-13.58, -9.14) | 24.00         | 13.565      | 26.632      | 27.938      | Trp-6, Lys-7, Trp-8, Arg-10, Gly-11, Arg-14, Tyr-17                                                                                          |
| 10   | -225.83              | (-13.52, -8.94) | 21.00         | 28.653      | 28.604      | 17.321      | Ser-21, His-54, Thr-56, Glu-118, Ile-119, Thr-120, Ser-121, Thr-122, Lys-123                                                                 |

## DAOA126

| Rank | Energy<br>(kcal/mol) | Energy Range    | Volume<br>(Å) | Center<br>x | Center<br>y | Center<br>z | Residues                                                                                                                                                                                       |
|------|----------------------|-----------------|---------------|-------------|-------------|-------------|------------------------------------------------------------------------------------------------------------------------------------------------------------------------------------------------|
| 1    | -972.29              | (-17.22, -8.90) | 83.00         | 31.864      | 27.764      | 26.947      | Phe-14, Phe-25, Gly-27, Phe-28, Gln-29, Arg-30, Ser-31, Thr-48, Arg-52, Val-55, Thr-56, Glu-59, Arg-63, Leu-70, Gln-74, Leu-77, Gln-78, Val-85, Ser-86, Tyr-87, Leu-88, Pro-89, His-95, Ile-99 |
| 2    | -791.47              | (-13.80, -8.90) | 73.00         | 28.529      | 18.190      | 39.681      | Met-1, Leu-5, Gln-29, Ser-40, Leu-41, Asn-42, Ala-45, Lys-46, Pro-91, Tyr-92, Ala-93, Phe-119, Asp-123, Thr-124, Glu-125, Ala-126                                                              |
| 3    | -290.84              | (-15.37, -8.97) | 25.00         | 20.168      | 27.371      | 21.653      | Arg-17, Ser-31, Ile-34, Ser-35, Lys-62, Glu-66, Leu-70                                                                                                                                         |
| 4    | -267.64              | (-13.41, -9.06) | 26.00         | 15.282      | 33.776      | 19.135      | Arg-15, Ser-16, Arg-17, Tyr-18, Thr-19, His-65, Glu-66                                                                                                                                         |
| 5    | -236.05              | (-18.30, -8.99) | 19.00         | 33.640      | 19.598      | 33.901      | Gln-29, Ala-45, Lys-46, Thr-48, Glu-49, Leu-88, Pro-89, Gln-90, Pro-91, Tyr-92                                                                                                                 |
| 6    | -221.83              | (-21.21, -8.94) | 16.00         | 22.627      | 20.561      | 42.396      | Met-1, Glu-3, Lys-4, Leu-5, His-118, Phe-119, Gly-122, Asp-123, Thr-124                                                                                                                        |
| 7    | -198.99              | (-12.14, -8.95) | 20.00         | 27.281      | 41.152      | 43.029      | Leu-100, Asn-101, Cys-106, Lys-109, Arg-110, Gln-113                                                                                                                                           |
| 8    | -192.81              | (-17.97, -9.69) | 13.00         | 28.606      | 26.326      | 35.692      | Leu-5, Met-6, Gly-27, Phe-28, Gln-29, Leu-33, Leu-88, Tyr-92, His-95, Ser-96, Phe-115                                                                                                          |
| 9    | -191.27              | (-13.10, -8.92) | 19.00         | 31.601      | 44.119      | 33.995      | Tyr-24, His-76, Arg-79, Ser-80, Gly-102, Asn-103, Leu-104, His-105, Cys-106, Lys-109                                                                                                           |
| 10   | -179.79              | (-14.56, -9.30) | 16.00         | 28.730      | 35.321      | 14.524      | Arg-63, Arg-64, Glu-66, Asp-67, Gly-68, Glu-71, Met-72, Arg-75                                                                                                                                 |

## DAOA153

| Rank | Energy<br>(kcal/mol) | Energy Range    | Volume<br>(Å) | Center<br>x | Center<br>y | Center<br>z | Residues                                                                                                                                               |
|------|----------------------|-----------------|---------------|-------------|-------------|-------------|--------------------------------------------------------------------------------------------------------------------------------------------------------|
| 1    | -1073.98             | (-17.67, -9.00) | 89.00         | 21.365      | 23.067      | 29.915      | Ser-99, Ser-100, Val-102, Gly-103, Leu-114,<br>Tyr-116, Glu-117, Ala-118, Ser-119, Lys-120,<br>Gln-124, Met-129, Ile-147, Thr-148, Ser-149,<br>Ala-152 |
| 2    | -623.73              | (-18.88, -8.98) | 52.00         | 31.007      | 20.691      | 21.272      | Arg-79, Ser-80, Leu-81, Cys-82, Trp-84, Val-<br>85, Tyr-87, Glu-97, Ser-100, His-101, Lys-104,<br>Lys-151, Glu-153                                     |
| 3    | -558.40              | (-14.33, -8.91) | 53.00         | 21.403      | 17.801      | 41.041      | Leu-2, Glu-3, Leu-5, Met-6, Asp-9, Phe-106,<br>Met-107, Asn-110, Phe-113, Ala-115, Tyr-116,<br>Ala-118, Asp-121, Arg-122, Arg-123                      |
| 4    | -518.09              | (-15.81, -9.15) | 46.00         | 40.769      | 40.630      | 32.475      | Lys-36, Glu-38, Asn-39, Ser-40, Asn-42, Ser-<br>43, Lys-46, Arg-63, Arg-64, Glu-66, Asp-67,<br>Leu-70                                                  |
| 5    | -513.77              | (-14.72, -8.95) | 49.00         | 28.183      | 27.492      | 45.292      | Glu-3, Lys-4, Met-6, Gly-7, Ala-8, Leu-11,<br>Gly-27, Phe-28, Gln-29, Ser-31, Arg-109, Asn-<br>110, Glu-112, Phe-113                                   |
| 6    | -433.85              | (-15.53, -8.96) | 40.00         | 41.151      | 27.331      | 20.288      | Thr-48, Glu-49, Glu-50, Gly-51, Arg-52, Val-<br>55, Leu-77, Gln-78, Leu-81, Pro-83, Trp-84,<br>Val-85, Leu-88                                          |
| 7    | -333.57              | (-14.53, -8.93) | 31.00         | 25.133      | 38.155      | 27.925      | Ser-37, Glu-38, Leu-41, Pro-91, Tyr-92, Leu-<br>95, Trp-130, Lys-138, Asp-139, Cys-142, His-<br>144                                                    |
| 8    | -319.07              | (-18.86, -8.90) | 28.00         | 46.581      | 29.296      | 38.183      | Tyr-24, Trp-61, Arg-64, His-65, Gly-68, Tyr-<br>69, Glu-71                                                                                             |
| 9    | -319.07              | (-18.86, -8.90) | 28.00         | 46.581      | 29.296      | 38.183      | Arg-17, Gly-103, Lys-104, Val-105, Phe-106,<br>Ala-118, Ser-119, Ala-152, Glu-153                                                                      |
