# Supplementary material for: Pharmacoinformatics, Adaptive Evolution, and Elucidation of Six Novel Compounds for Schizophrenia Treatment by Targeting DAOA (G72) Isoforms
Source: Hindawi journal article supplement (doi:10.1155/2017/5925714), 2017-01-01
Supplement: f1 [file 5925714.f1.zip]

# Protein-Protein Interaction Analysis of top ten complexes

## DAOA-82

| Models  | Global Energy | Attractive VdW | Repulsive VdW | ACE   | HB    | DOA                                                                                                                                                     | DAOA                                                                                                                  |
|---------|---------------|----------------|---------------|-------|-------|---------------------------------------------------------------------------------------------------------------------------------------------------------|-----------------------------------------------------------------------------------------------------------------------|
| Soln-1  | -15.65        | -21.29         | 9.79          | 5.11  | -5.04 | Asn-86, Thr-153, Arg-151, Gly-156, Glu-154, Asn-83, His-78, Pro-82, Arg-155, His-20, Glu-21, Arg-22, His-24, Ser-25                                     | Gln-66, Leu-17, Lys-67, Pro-12, Tyr-16, Arg-8, Ser-9, His-5, Thr-77, Leu-43, Phe-42, His-73                           |
| Soln-2  | -4.08         | -29.15         | 26.73         | 9.09  | -1.39 | Gly-277, Ile-276, Leu-42, Phe-39, Pro-41, Thr-40, Lys-142, Asn-143, Gln-146, Glu-150, Thr-233, Gln-234, Asn-86, Glu-85, Pro-82, Phe-159                 | Gln-66, Lys-67, His-73, Leu-17, Lys-11, Ser-9, Thr-77, Arg-8, Leu-43, His-5, Arg-4, Ala-2, Met-1                      |
| Soln-3  | 8.46          | -6.57          | 1.95          | 2.10  | -1.37 | Asn-252, Ile-253, Gln-201, Gln-254, Asp-255, Gln-243, Asn-257, Ile-241, Phe-242, Thr-258, Glu-261, Asn-225, Gly-262, Arg-265, Arg-221, Asp-218, Glu-220 | Lys-74, Glu-75, His-73, Thr-79, Ile-76, Lys-80, Thr-79, Ile-76, Lys-80, Thr-77, Ser-78, Ala-81, Glu-82, Leu-43, His-5 |
| Soln-4  | 8.61          | -2.10          | 1.16          | -0.97 | 0.00  | Arg-265, Glu-261, Asn-257, Trp-260                                                                                                                      | Ser-29, Lys-33, Ala-37, Met-36                                                                                        |
| Soln-5  | 10.61         | -23.11         | 16.85         | 2.49  | -3.03 | Glu-100, Glu-220, Pro-219, Ser-57, Phe-98, Arg-22, Gly-222, His-217, Asn-60, Pro-287, Arg-286, Gln-196, Leu-244, Val-285                                | Glu-26, Ser-20, Gly-32, Tyr-40, Phe-35, Ala-37, Ser-48, Met-36, Asp-50, Lys-80, Asn-39, Glu-82, Arg-38                |
| Soln-6  | 11.92         | -30.37         | 33.90         | 11.96 | -2.24 | Thr-235, Lys-204, Ile-276, Gly-277, Glu-278, Thr-233, Gln-234, Arg-279, Glu-85, Asn-143, Lys-142, Asn-86, Gln-146, Leu-42, Glu-150, Thr-149, Thr-153    | Asn-64, Asn-62, Gln-65, Gln-66, Pro-18, Gln-19, Leu-17, Trp-13, Lys-67, Pro-12, Cys-11, His-73, Arg-8, Arg-4          |
| Soln-7  | 13.37         | -6.27          | 4.19          | -0.67 | 0.00  | Ser-81, His-80, Ser-77, Leu-76, Asp-73, Leu-112                                                                                                         | Leu-17, Gln-19, Tyr-16, Glu-23, Ala-22, Glu-26                                                                        |
| Soln-8  | 17.58         | -5.24          | 1.00          | 6.31  | -0.49 | Lys-211, Gln-234, Glu-85                                                                                                                                | Thr-60, Arg-57, Arg-51, Ala-47, Ser-48, Asp-50, Lys-49                                                                |
| Soln-9  | 28.26         | -21.36         | 8.91          | 11.22 | -1.70 | Phe-159, Thr-149, Gln-146, Asn-143, Phe-39, Gln-161, Thr-40, Lys-142, Pro-41, Gln-234, Lys-204, Asp-206                                                 | Leu-17, Gln-19, Tyr-16, Cys-11, Arg-8, Glu-23, Gln-7, Arg-4, Met-1                                                    |
| Soln-10 | 580.16        | -28.70         | 680.93        | 18.34 | -2.98 | Pro-62, Gln-63, Asn-61, Asn-60, Gln-288, Pro-287, Arg-286, Leu-194, Ile-289, Glu-292, Leu-291, Arg-293, Gln-295, Glu-336, Leu-329, Arg-332              | Gln-65, Asn-62, Ser-70, Cys-61, Pro-20, Thr-60, Trp-59, Ala-22, Thr-21, Arg-57, Glu-56, Gln-53                        |

**DAOA-125**

| <b>Models</b> | <b>Global Energy</b> | <b>Attractive VdW</b> | <b>Repulsive VdW</b> | <b>ACE</b> | <b>HB</b> | <b>DOA</b>                                                                                                                                                                                          | <b>DAOA</b>                                                                                                                                           |
|---------------|----------------------|-----------------------|----------------------|------------|-----------|-----------------------------------------------------------------------------------------------------------------------------------------------------------------------------------------------------|-------------------------------------------------------------------------------------------------------------------------------------------------------|
| Soln-1        | -14.97               | -27.04                | 13.97                | 7.15       | -4.74     | Pro-41, Leu-42, Lys-142, Gln-234, Arg-279, Thr-235, Asp-206, Thr-280, Leu-250, Asn-251, Glu-278, Ile-275, Arg-274, His-256, Ile-253, Trp-260, Lys-271, Asn-257, Glu-261                             | Lys-7, Glu-125, Trp-8, Thr-122, Arg-14, Tyr-17, Val-18, His-16, His116, Pro-97, Arg-100, Arg-94, Gln-96, Asp-93, Ala-90, Ser-91, Lys-92               |
| Soln-2        | 6.33                 | -24.48                | 33.98                | 3.36       | -2.62     | Gln-254, Thr-258, Gly-262, Pro-126, Asp-127, Tyr-128, Pro-227, His-99, Arg-221, Glu-220, Pro-219, Gly-222, Gln-243, Phe-242, Leu-244                                                                | Thr-120, Glu-118, Glu-125, Thr-122, His-116, Lys-123, Lys-7, Gly-20, His-54, Leu-19, Pro-97, Val-18, Tyr-17                                           |
| Soln-3        | 7.68                 | -18.80                | 16.51                | 7.17       | -2.92     | Asp-58, Asn-60, Pro-59, Ser-57, Gln-288, Pro-287, Tyr-55, Tyr-314, Arg-286, Leu-194, Pro-219, Glu-220, Gln-196, Leu-244                                                                             | Lys-117, Glu-118, Lys-110, Asp-111, His-116, Gln-112, Ser-113, Gln-109, Arg-100, Thr-122                                                              |
| Soln-4        | 11.35                | -12.38                | 2.76                 | 2.72       | -0.60     | Gln-234, Thr-233, Gly-232, Pro-208, Asp-206, Lys-211, Trp-209, Arg-274, Asn-272, Pro-268, Met-124                                                                                                   | Ile-119, Ser-121, His-116, Lys-123, Thr-122, Val-18, Tyr-17, Ser-91, Lys-92                                                                           |
| Soln-5        | 17.55                | -33.02                | 14.48                | 19.10      | -2.97     | Arg-293, Leu-320, Glu-294, Glu-292, Glu-325, Gln-63, Asp-66, Trp-67, Asn-61, Arg-290, Gln-190, Gln-288, Asn-60, Arg-286, Asp-58, Ser-57                                                             | Ile-119, Lys-117, Glu-118, Lys-123, Thr-122, His-116, Asn-115, Gln-112, Arg-100, Pro-97, Val-18, Gln-96, Asp-93, Ser-91, Lys-92                       |
| Soln-6        | 19.13                | -26.66                | 12.33                | 13.53      | -2.98     | Arg-332, Glu-336, Gln-63, Arg-293, Asn-61, Glu-292, Gln-295, Asn-302, Asn-60, Gln-288, Arg-290, Arg-286, Glu-294, Arg-297, Gln-190, Leu-194, Pro-193                                                | Gly-32, Ala-31, Arg-30, Met-1, Thr-3, Trp-6, Lys-7, Glu-125, Ala-124, Thr-120, Ser-121, Thr-122, Glu-118, Tyr-17                                      |
| Soln-7        | 22.44                | -6.07                 | 1.31                 | 5.70       | -0.64     | Lys-338, Lys-337, Glu-335, Glu-336, Pro-300, Ser-301, Asn-302, Ile-333 Glu-304, Arg-332, Arg-297, Arg-293, Leu-329, Glu-325, Glu-292, Gln-190, Arg-290, Arg-191, Asp-192, Arg-286, Pro-193, Leu-194 | Glu-118, Ile-119, His-116, Ser-121, Ala-124, Thr-122, Glu-125, Lys-123, Ser-21, Trp-8, Tyr-17, Val-18, Asp-93, Arg-94, Lys-92, Ser-91, Ala-90, Glu-89 |
| Soln-8        | 27.53                | -15.22                | 5.55                 | 10.56      | -2.89     | Gln-234, Asn-143, Lys-204, Ile-275, Ile-276, Lys-142, Gln-146, Gly-277, Glu-278, Arg-279, Pro-41, Leu-42                                                                                            | Thr-33, Ser-34, Asn-35, Gln-36, Met-1, Arg-2, Thr-3, His-9, Thr-44, Lys-41, Trp-37, Asn-38                                                            |
| Soln-9        | 41.57                | -12.86                | 36.42                | 10.95      | -0.43     | Gln-234, Thr-235, Pro-208, Trp-209, Arg-274, Asn-272                                                                                                                                                | Gln-36, Arg-2, Lys-41, Trp-6, His-9, Thr-44, Arg-10, Tyr-13                                                                                           |
| Soln-10       | 43.59                | -33.05                | 63.67                | 6.83       | -3.27     | Ser-301, Lys-338, Lys-337, Leu-339, Glu-336, Asp-176, Glu-335, Ser-340, Arg-332, Met-1, Gln-28, Pro-29, Leu-27, Val-26, Ser-25                                                                      | Glu-118, Ile-119, His-116, Ser-121, Thr-56, Thr-122, Glu-125, Lys-123, His-54, Pro-97, Trp-8, Leu-19, Val-18, Tyr-17, Asp-93, Lys-92                  |

DAOA-126

| Models  | Global Energy | Attractive VdW | Repulsive VdW | ACE   | HB    | DOA                                                                                                                                                                                                   | DAOA                                                                                                                                                                            |
|---------|---------------|----------------|---------------|-------|-------|-------------------------------------------------------------------------------------------------------------------------------------------------------------------------------------------------------|---------------------------------------------------------------------------------------------------------------------------------------------------------------------------------|
| Soln-1  | -22.87        | -31.90         | 21.72         | 4.23  | -3.91 | Thr-269, Arg-120, Pro-268, Glu-267, Leu-266, Arg-265, Met-124, Glu-121, Asp-123, Thr-118, Pro-119, Phe-125, Leu-122, Pro-126, Gly-129                                                                 | Val-85, Gln-78, Met-72, Ser-86, Gln-74, Arg-75, Tyr-87, Pro-89, Glu-71, Arg-63, Arg-64, Gly-60, Thr-56, Glu-53, Arg-57, Leu-88                                                  |
| Soln-2  | -19.15        | -31.46         | 11.45         | 2.15  | -1.80 | Pro-193, Leu-194, Leu-244, Pro-287, Phe-242, Asn-60, Gly-222, Ile-223, Arg-221, Glu-220, Pro-219, Ser-57, Asp-58, Ile-102, Glu-100, Leu-244, Pro-103, Ala-101                                         | Arg-110, Thr-19, Asp-9, Gln-12, Arg-17, Arg-15, Leu-11, His-118, Lys-62, Leu-34, Glu-3, Ser-37, Lys-36, Glu-38, Thr-19, Arg-15, Gly-7                                           |
| Soln-3  | -12.09        | -32.47         | 10.98         | 8.25  | -3.21 | Arg-115, Glu-121, Gly-113, Thr-135, Ser-93, His-212, Glu-267, Lys-211, Thr-269, Met-210, Trp-209, Leu-91, His-80, Val-79, Phe-90, Gly-232, Leu-89, Thr-233, Glu-85                                    | Gln-12, Arg-17, Arg-15, Leu-11, Lys-62, Trp-61, Ser-35, Ile-32, Glu-3, Leu-2, Ser-37, Lys-36, Glu-38, Asn-39                                                                    |
| Soln-4  | 0.44          | -11.63         | 6.38          | 4.11  | -2.72 | Gly-277, His-256, Glu-278, Ile-253, Arg-273, Gln-254, Asn-251, Asn-252, Pro-41, Thr-40, Thr-280, Leu-42, Leu-250, Thr-43, Glu-249, Phe-39, Arg-38, Ser-248, Gln-161, Asp-37, Ala-36, Arg-162, Lys-163 | Tyr-18, Thr-19, Ser-16, Arg-17, Glu-66, Gln-12, His-65, Asp-9, Arg-15, Ala-8, Ser-10, Leu-11, Gly-7, Lys-62, Leu-34, Met-6, His-118, Ser-35, Ser-37, Lys-4, Glu-3, Leu-2, Met-1 |
| Soln-5  | 8.00          | -14.12         | 5.88          | 6.26  | -2.01 | Ser-25, His-24, Glu-21, Arg-155, Glu-154, Arg-151, His-78, Asn-83, Pro-82                                                                                                                             | His-107, Arg-110, Ile-111, Leu-16, Asp-9, Gln-12, Arg-15, Ala-8, Leu-11, Gly-7, Leu-34, Ser-35, Ser-37, Lys-36, Glu-38                                                          |
| Soln-6  | 8.40          | -29.99         | 17.28         | 10.52 | -3.59 | Leu-339, Lys-338, Glu-336, Lys-337, Met-1, Asp-176, Glu-304, Ala-175, Gly-174, Gln-295, Ser-301, Pro-300, Arg-297, Arg-172                                                                            | Tyr-69, His-76, Arg-79, Met-72, Ala-73, Arg-75, Gln-78, Lys-32, Gln-74, Val-85, Po-83, Ser-86, Leu-88, Tyr-87, Thr-56                                                           |
| Soln-7  | 12.88         | -21.53         | 19.42         | 8.61  | -1.03 | Arg-151, Thr-153, Glu-150, Asn-86, Trp-147, Glu-85, Gln-146, Asn-143, Lys-142, Gln-234, Leu-42, Lys-204, Ile-276                                                                                      | Arg-79, Leu-81, Arg-75, Lys-82, Gln-78, Pro-83, Trp-84, Ser-86, Tyr-81, Gln-90, Arg-52, Glu-53                                                                                  |
| Soln-8  | 15.38         | -29.44         | 14.73         | 16.26 | -2.78 | Glu-336, Arg-332, Leu-329, Glu-325, Arg-293, Asn-302, Gln-295, Gln-63, Glu-292, Glu-294, Asn-61, Arg-297, Arg-290, Gln-288, Asn-60, Gln-190, Arg-286, Asp-192, Leu-194                                | Cys-106, His-105, His-107, Arg-110, Lys-22, Ile-111, Ile-114, Thr-19, Leu-13, Asp-9, Glu-121, His-118, Ala-3, Gly-7, Gln-12, Ser-16, Arg-17, Thr-18                             |
| Soln-9  | 17.57         | -34.85         | 23.15         | 11.98 | -6.04 | His-80, Thr-135, Ser-93, Leu-91, His-212, Lys-211, Phe-90, Trp-209, Pro-231, Pro-208, Glu-85, Gly-232, Thr-233, Gln-234, Thr-235, Asp-206                                                             | Tyr-24, Tyr-69, Asp-67, Gly-68, His-76, Met-72, Gln-74, Arg-63, Glu-71, Arg-64, Arg-75, Gln-78, Cys-82, Gly-60, Thr-56, Arg-57, Arg-79                                          |
| Soln-10 | 21.54         | -23.00         | 11.32         | 12.03 | -1.55 | Gln-28, Asp-31, Leu-339, Lys-33, Lys-337, Asp-176, Arg-2                                                                                                                                              | Gln-74, Gln-78, Ser-86, Tyr-87, Pro-89, Thr-56, Arg-52, Arg-57, Glu-53                                                                                                          |

**DAOA-153**

| <b>Models</b> | <b>Global Energy</b> | <b>Attractive VdW</b> | <b>Repulsive VdW</b> | <b>ACE</b> | <b>HB</b> | <b>DOA</b>                                                                                                                                                           | <b>DAOA</b>                                                                                                                                         |
|---------------|----------------------|-----------------------|----------------------|------------|-----------|----------------------------------------------------------------------------------------------------------------------------------------------------------------------|-----------------------------------------------------------------------------------------------------------------------------------------------------|
| Soln-1        | -29.01               | -31.15                | 12.88                | 1.02       | -3.25     | Glu-220, Arg-221, Gly-222, Pro-219, Ile-223, His-217, Glu-100, Asn-60, Ala-101, Ile-102, Ser-57, Pro-59, Asp-58, Pro-103, Pro-62, Pro-105, Asp-104, Ser-106          | Lys-58, Lys-62, Arg-57, Trp-61, His-65, Pro-83, Gln-78, Gly-68, Glu-71, Arg-75, Arg-79, Tyr-24, Lys-22, Gly-21                                      |
| Soln-2        | -5.84                | -30.04                | 16.20                | 3.62       | -2.37     | Asp-206, Lys-142, Ile-276, Arg-274, Ile-275, Gly-277, Arg-279, Pro-41, Leu-42, Glu-278, Asn-251, Glu-249, leu-250, Ser-243, Trp-247, Lys-163, Ile-253                | Lys-4, Leu-5, Ala-8, Gln-29, Phe-28, Leu-11, Gln-12, Ile-26, Arg-15, Arg-30, Tyr-69, Asp-67, Gly-68, Leu-20, Tyr-24, Glu-66, His-65, Lys-62, Gly-21 |
| Soln-3        | -5.58                | -14.23                | 6.09                 | 3.79       | -0.99     | Pro-62, Asp-58, Asp-104, Pro-103, Pro-287, Leu-194, Ile-223, Glu-220, Gly-222, Leu-244                                                                               | His-65, Trp-61, Arg-57, Thr-54, Tyr-24, Arg-15, Arg-79, Leu-20, Lys-22, Thr-19                                                                      |
| Soln-4        | -0.24                | -17.67                | 6.49                 | 7.64       | -3.73     | Glu-220, Pro-219, Glu-100, Ala-101, Asn-60, Ile-102, Pro-103, Asp-58, Asp-104, Ser-106, Lys-108, Asp-109, Pro-62                                                     | Lys-58, Arg-64, His-65, Arg-57, Trp-61, Pro-83, Glu-71, Arg-75, Arg-79, Tyr-24, Lys-22, Gly-21, Leu-20, Thr-19                                      |
| Soln-5        | 0.38                 | -8.93                 | 1.87                 | 1.22       | -0.69     | Glu-100, His-99, Pro-219, Glu-220, Asp-218, Ile-223, Gly-222, Arg-221, Phe-242, Leu-244, Gly-245, Asn-257, Gln-254                                                   | Arg-52, Trp-84, Val-85, Pro-83, Thr-54, Val-55, Arg-57, Gln-78, Trp-61, Lys-22, Thr-19                                                              |
| Soln-6        | 6.49                 | -4.18                 | 2.40                 | -0.66      | -1.55     | His-80, Pro-82, Val-79, Ala-84, Lys-211, Thr-233, Met-210, Pro-208, Trp-209, Gln-234, Ala-207, Val-236, Thr-269, Asp-206                                             | Glu-66, His-65, Trp-61, Ile-26, Phe-25, Tyr-24, Leu-11, Arg-15, Tyr-24, Leu-13, Gln-12, Tyr-18, Leu-20, Ser-16, Gly-21, Thr-19, Ala-8               |
| Soln-7        | 9.33                 | -35.97                | 13.72                | 22.30      | -3.09     | His-80, Ser-81, Pro-82, Ala-84, Phe-90, Arg-151, Asn-85, Glu-85, Glu-150, Lys-211, Gly-232, Thr-233, Gln-146, Lys-142, Gln-234, Thr-40, Pro-208, Pro-41, Asp-206     | Gln-136, Asn-135, Arg-128, Gln-29, Cys-132, Pro-125, Phe-113, Gln-124, Ala-115, Arg-122, Arg-123, Glu-3, Lys-4                                      |
| Soln-8        | 10.54                | -26.12                | 13.31                | 13.19      | -3.77     | Ile-253, Leu-250, Asn-251, His-256, Glu-249, Thr-280, Glu-278, Arg-279, Ile-275, Arg-274, Ile-276, Arg-38, Leu-42, Pro-41, Phe-39, Thr-40, Lys-142, Gln-146, Thr-149 | Ser-141, Lys-138, Lys-142, Glu-38, Lys-36, Tyr-92, Asn-42, Pro-91, Lys-46, Glu-49, Gly-51, Glu-59, Lys-62, Arg-63, Glu-66                           |
| Soln-9        | 13.88                | -9.46                 | 10.01                | 2.60       | -2.26     | Val-79, His-80, Phe-90, Thr-233, Gln-234, Leu-91, Leu-112, Gly-232, Thr-235, Asp-206, Pro-208, Lys-211, Trp-209                                                      | Ser-35, Gln-29, Arg-30, Ser-37, Phe-28, Glu-66, Lys-62, His-68, Gly-68, Tyr-69, Trp-61, Tyr-24                                                      |
| Soln-10       | 894.38               | -52.30                | 1157.00              | 9.28       | -5.94     | Lys-158, Glu-150, Thr-40, Gln-146, Lys-142                                                                                                                           | Asn-135, Glu-3, Lys-4                                                                                                                               |
