# Supplementary material for: Pharmacoinformatics, Adaptive Evolution, and Elucidation of Six Novel Compounds for Schizophrenia Treatment by Targeting DAOA (G72) Isoforms
Source: Biomed Res Int. 2017 Jan 19;2017:5925714. doi: 10.1155/2017/5925714 (PMC5288522; doi:10.1155/2017/5925714)
Supplement: Supplementary file 1 — Analyses of 10 MB region of selected species and synteny of DAOA. [file 5925714.f1.zip]

Archive with 4 entries (4 files):
- Supplementary Material/Supp file 1 Model-Evaluation-of-DAOA isoforms_BMRI_1838197.pdf
- Supplementary Material/Supp File 2Top 10 binding pockets  by SiteHound.pdf
- Supplementary Material/Supp File 3 Protein-Protein  Interaction Analysis of top ten complexes.pdf
- Supplementary Material/Supplementary Figure 1.doc
